# Supplementary material
Source: publisher site journal article supplement (https://static.cambridge.org/content/id/urn:cambridge.org:id:article:S0008347X18000627/resource/name/S0008347X18000627supp001.xlsx)
Supplement: Supplementary file 1 [file S0008347X18000627supp001.xlsx]

## Sheet: Heading
The Canadian Entomologist
SUPPLEMENTARY DATA: Raw data and statistics for tests of normality
Direct and residual contact toxicity of insecticides to the brown marmorated stink bug, Halyomorpha halys
A.E. Gradish, H. Fraser, and C.D. Scott-Dupree

## Sheet: Direct Contact Raw Data
Active Ingredient	Formulation	Concentration (mg a.i./L)	Rate	Rep	n	48 h Mortality	48 h Severely Affected	Control n	Control 48 h Mortaility	Control 48 h Severely Affected
thiamethoxam	Actara 25WG	43.8	half	1	5	0	5	5	0	0
thiamethoxam	Actara 25WG	87.5	full	1	5	0	5	5	0	0
thiamethoxam	Actara 25WG	175	double	1	5	0	5	5	0	0
thiamethoxam	Actara 25WG	43.8	half	2	5	0	5	5	0	0
thiamethoxam	Actara 25WG	87.5	full	2	5	0	5	5	0	0
thiamethoxam	Actara 25WG	175	double	2	5	1	4	5	0	0
thiamethoxam	Actara 25WG	43.8	half	3	5	0	5	5	0	0
thiamethoxam	Actara 25WG	87.5	full	3	5	0	5	5	0	0
thiamethoxam	Actara 25WG	175	double	3	5	1	4	5	0	0
thiamethoxam	Actara 25WG	43.8	half	4	5	0	5	5	0	0
thiamethoxam	Actara 25WG	87.5	full	4	5	0	5	5	0	0
thiamethoxam	Actara 25WG	175	double	4	5	0	5	5	0	0
thiamethoxam	Actara 25WG	43.8	half	5	4	0	4	5	0	0
thiamethoxam	Actara 25WG	87.5	full	5	5	0	5	5	0	0
thiamethoxam	Actara 25WG	175	double	5	5	0	5	5	0	0
thiamethoxam	Actara 25WG	43.8	half	6	5	0	5	5	1	0
thiamethoxam	Actara 25WG	87.5	full	6	5	0	5	5	1	0
thiamethoxam	Actara 25WG	175	double	6	5	0	5	5	1	0
thiamethoxam	Actara 25WG	43.8	half	7	5	1	4	5	1	0
thiamethoxam	Actara 25WG	87.5	full	7	5	0	5	5	1	0
thiamethoxam	Actara 25WG	175	double	7	5	2	3	5	1	0
thiamethoxam	Actara 25WG	43.8	half	8	5	0	5	5	0	0
thiamethoxam	Actara 25WG	87.5	full	8	5	0	5	5	0	0
thiamethoxam	Actara 25WG	175	double	8	5	2	3	5	0	0
thiamethoxam	Actara 25WG	43.8	half	9	5	0	5	5	0	0
thiamethoxam	Actara 25WG	87.5	full	9	5	0	5	5	0	0
thiamethoxam	Actara 25WG	175	double	9	5	1	4	5	0	0
thiamethoxam	Actara 25WG	43.8	half	10	5	1	4	4	0	0
thiamethoxam	Actara 25WG	87.5	full	10	5	1	4	4	0	0
thiamethoxam	Actara 25WG	175	double	10	5	1	4	4	0	0
boric acid	NA	2440	half	1	5	0	0	5	0	0
boric acid	NA	4880	full	1	5	1	0	5	0	0
boric acid	NA	2440	half	2	5	1	0	5	0	0
boric acid	NA	4880	full	2	5	1	0	5	0	0
boric acid	NA	2440	half	3	5	1	0	5	0	0
boric acid	NA	4880	full	3	5	0	0	5	0	0
boric acid	NA	2440	half	5	5	0	0	5	0	0
boric acid	NA	4880	full	5	5	0	0	5	0	0
boric acid	NA	2440	half	6	6	0	0	5	1	0
boric acid	NA	4880	full	6	5	2	0	5	1	0
boric acid	NA	2440	half	7	5	1	0	5	0	0
boric acid	NA	4880	full	7	5	0	0	5	0	0
boric acid	NA	2440	half	8	5	0	0	5	1	0
boric acid	NA	4880	full	8	5	2	0	5	1	0
boric acid	NA	2440	half	9	5	0	0	5	0	0
boric acid	NA	4880	full	9	5	1	0	5	0	0
boric acid	NA	2440	half	10	5	0	0	5	1	0
boric acid	NA	4880	full	10	5	2	0	5	1	0
boric acid	NA	2440	half	11	5	0	0	5	1	0
boric acid	NA	4880	full	11	5	0	0	5	1	0
boric acid	NA	2440	half	12	5	1	0	5	0	0
sulfoxaflor	Closer	30	half	2	5	1	0	5	0	0
sulfoxaflor	Closer	60	full	2	5	1	0	5	0	0
sulfoxaflor	Closer	120	double	2	5	2	0	5	0	0
sulfoxaflor	Closer	30	half	3	5	1	0	5	1	0
sulfoxaflor	Closer	60	full	3	5	1	0	5	1	0
sulfoxaflor	Closer	120	double	3	5	0	0	5	1	0
sulfoxaflor	Closer	30	half	4	5	0	0	5	1	0
sulfoxaflor	Closer	60	full	4	5	0	0	5	1	0
sulfoxaflor	Closer	120	double	4	4	2	0	5	1	0
sulfoxaflor	Closer	30	half	5	5	0	0	5	1	0
sulfoxaflor	Closer	60	full	5	5	1	0	5	1	0
sulfoxaflor	Closer	120	double	5	5	1	0	5	1	0
sulfoxaflor	Closer	30	half	6	5	1	0	5	0	0
sulfoxaflor	Closer	60	full	6	5	0	0	5	0	0
sulfoxaflor	Closer	120	double	6	5	2	0	5	0	0
sulfoxaflor	Closer	30	half	7	5	1	0	5	0	0
sulfoxaflor	Closer	60	full	7	5	0	0	5	0	0
sulfoxaflor	Closer	120	double	7	5	1	0	5	0	0
sulfoxaflor	Closer	30	half	8	5	0	0	5	0	0
sulfoxaflor	Closer	60	full	8	5	0	1	5	0	0
sulfoxaflor	Closer	120	double	8	5	4	0	5	0	0
sulfoxaflor	Closer	30	half	9	5	0	1	5	0	0
sulfoxaflor	Closer	60	full	9	5	3	0	5	0	0
sulfoxaflor	Closer	120	double	9	5	1	3	5	0	0
sulfoxaflor	Closer	30	half	10	5	2	0	5	1	0
sulfoxaflor	Closer	60	full	10	5	1	1	5	1	0
sulfoxaflor	Closer	120	double	10	5	0	1	5	1	0
sulfoxaflor	Closer	30	half	11	5	1	1	5	0	0
sulfoxaflor	Closer	60	full	11	5	1	0	5	0	0
sulfoxaflor	Closer	120	double	11	6	0	6	5	0	0
sulfoxaflor	Closer	30	half	12	5	0	0	5	0	0
sulfoxaflor	Closer	60	full	12	5	1	0	5	0	0
sulfoxaflor	Closer	120	double	12	5	1	1	5	0	0
sulfoxaflor	Closer	30	half	13	5	1	0	5	0	0
sulfoxaflor	Closer	60	full	13	5	0	0	5	0	0
sulfoxaflor	Closer	120	double	13	5	2	1	5	0	0
sulfoxaflor	Closer	30	half	14	5	2	0	5	1	0
sulfoxaflor	Closer	60	full	14	5	0	1	5	1	0
sulfoxaflor	Closer	120	double	14	5	3	2	5	1	0
clothianidin	Clutch 50WG	78.8	half	3	5	1	4	5	0	0
clothianidin	Clutch 50WG	157.5	full	3	5	2	3	5	0	0
clothianidin	Clutch 50WG	351	double	3	5	2	3	5	0	0
clothianidin	Clutch 50WG	78.8	half	4	5	3	2	5	0	0
clothianidin	Clutch 50WG	157.5	full	4	5	3	2	5	0	0
clothianidin	Clutch 50WG	351	double	4	5	3	2	5	0	0
clothianidin	Clutch 50WG	78.8	half	5	5	2	3	5	1	0
clothianidin	Clutch 50WG	157.5	full	5	5	3	2	5	1	0
clothianidin	Clutch 50WG	351	double	5	6	2	4	5	1	0
clothianidin	Clutch 50WG	78.8	half	6	5	0	5	5	1	0
clothianidin	Clutch 50WG	157.5	full	6	5	3	2	5	1	0
clothianidin	Clutch 50WG	351	double	6	5	3	2	5	1	0
clothianidin	Clutch 50WG	78.8	half	2	5	2	3	6	0	0
clothianidin	Clutch 50WG	157.5	full	2	4	2	2	6	0	0
clothianidin	Clutch 50WG	351	double	2	5	0	5	6	0	0
clothianidin	Clutch 50WG	78.8	half	7	5	0	5	5	0	0
clothianidin	Clutch 50WG	157.5	full	7	5	1	4	5	0	0
clothianidin	Clutch 50WG	351	double	7	5	2	3	5	0	0
clothianidin	Clutch 50WG	78.8	half	8	5	0	5	5	0	0
clothianidin	Clutch 50WG	157.5	full	8	5	2	3	5	0	0
clothianidin	Clutch 50WG	351	double	8	5	3	2	5	0	0
clothianidin	Clutch 50WG	78.8	half	9	5	1	4	5	0	0
clothianidin	Clutch 50WG	157.5	full	9	5	2	3	5	0	0
clothianidin	Clutch 50WG	351	double	9	5	0	5	5	0	0
clothianidin	Clutch 50WG	78.8	half	10	5	2	3	6	1	0
clothianidin	Clutch 50WG	157.5	full	10	5	1	4	6	1	0
clothianidin	Clutch 50WG	351	double	10	5	3	2	6	1	0
thiamethoxam+lambda-cyhalothrin	Endigo	12.8+9.6	half	2	5	0	5	5	1	0
thiamethoxam+lambda-cyhalothrin	Endigo	25.5+19.1	full	2	5	1	4	5	1	0
thiamethoxam+lambda-cyhalothrin	Endigo	51+38.2	double	2	5	1	4	5	1	0
thiamethoxam+lambda-cyhalothrin	Endigo	12.8+9.6	half	3	5	0	5	5	0	0
thiamethoxam+lambda-cyhalothrin	Endigo	25.5+19.1	full	3	5	1	4	5	0	0
thiamethoxam+lambda-cyhalothrin	Endigo	51+38.2	double	3	5	0	5	5	0	0
thiamethoxam+lambda-cyhalothrin	Endigo	12.8+9.6	half	4	5	0	5	5	0	0
thiamethoxam+lambda-cyhalothrin	Endigo	25.5+19.1	full	4	5	0	5	5	0	0
thiamethoxam+lambda-cyhalothrin	Endigo	51+38.2	double	4	5	0	5	5	0	0
thiamethoxam+lambda-cyhalothrin	Endigo	12.8+9.6	half	5	5	1	4	5	0	0
thiamethoxam+lambda-cyhalothrin	Endigo	25.5+19.1	full	5	5	0	5	5	0	0
thiamethoxam+lambda-cyhalothrin	Endigo	51+38.2	double	5	5	1	4	5	0	0
thiamethoxam+lambda-cyhalothrin	Endigo	12.8+9.6	half	6	5	2	3	5	0	0
thiamethoxam+lambda-cyhalothrin	Endigo	25.5+19.1	full	6	5	0	5	5	0	0
thiamethoxam+lambda-cyhalothrin	Endigo	51+38.2	double	6	5	0	5	5	0	0
thiamethoxam+lambda-cyhalothrin	Endigo	12.8+9.6	half	7	5	0	0	5	0	0
thiamethoxam+lambda-cyhalothrin	Endigo	25.5+19.1	full	7	5	2	3	5	0	0
thiamethoxam+lambda-cyhalothrin	Endigo	51+38.2	double	7	5	0	5	5	0	0
thiamethoxam+lambda-cyhalothrin	Endigo	12.8+9.6	half	8	5	0	0	5	0	0
thiamethoxam+lambda-cyhalothrin	Endigo	25.5+19.1	full	8	5	1	4	5	0	0
thiamethoxam+lambda-cyhalothrin	Endigo	51+38.2	double	8	5	1	4	5	0	0
thiamethoxam+lambda-cyhalothrin	Endigo	12.8+9.6	half	9	5	0	0	5	0	0
thiamethoxam+lambda-cyhalothrin	Endigo	25.5+19.1	full	9	5	0	0	5	0	0
thiamethoxam+lambda-cyhalothrin	Endigo	51+38.2	double	9	5	2	3	5	0	0
thiamethoxam+lambda-cyhalothrin	Endigo	12.8+9.6	half	10	5	3	0	5	1	0
thiamethoxam+lambda-cyhalothrin	Endigo	25.5+19.1	full	10	5	2	3	5	1	0
thiamethoxam+lambda-cyhalothrin	Endigo	51+38.2	double	10	5	0	5	5	1	0
thiamethoxam+lambda-cyhalothrin	Endigo	12.8+9.6	half	11	5	0	5	5	1	0
thiamethoxam+lambda-cyhalothrin	Endigo	25.5+19.1	full	11	5	3	2	5	1	0
thiamethoxam+lambda-cyhalothrin	Endigo	51+38.2	double	11	5	3	2	5	1	0
chlorpyrifos	Lorsban 4E	636	half	4	5	2	0	5	1	0
chlorpyrifos	Lorsban 4E	1272	full	4	5	5	0	5	1	0
chlorpyrifos	Lorsban 4E	2544	double	4	5	5	0	5	1	0
chlorpyrifos	Lorsban 4E	636	half	5	5	1	3	5	0	0
chlorpyrifos	Lorsban 4E	1272	full	5	5	3	2	5	0	0
chlorpyrifos	Lorsban 4E	2544	double	5	5	4	1	5	0	0
chlorpyrifos	Lorsban 4E	636	half	6	5	3	1	5	0	0
chlorpyrifos	Lorsban 4E	1272	full	6	5	4	1	5	0	0
chlorpyrifos	Lorsban 4E	2544	double	6	5	5	0	5	0	0
chlorpyrifos	Lorsban 4E	636	half	7	5	1	4	5	0	0
chlorpyrifos	Lorsban 4E	1272	full	7	4	2	1	5	0	0
chlorpyrifos	Lorsban 4E	2544	double	7	6	5	1	5	0	0
chlorpyrifos	Lorsban 4E	636	half	8	5	2	3	4	0	0
chlorpyrifos	Lorsban 4E	1272	full	8	6	5	0	4	0	0
chlorpyrifos	Lorsban 4E	2544	double	8	5	4	1	4	0	0
chlorpyrifos	Lorsban 4E	636	half	1	4	3	0	4	0	0
chlorpyrifos	Lorsban 4E	1272	full	1	4	4	0	4	0	0
chlorpyrifos	Lorsban 4E	2544	double	1	4	4	0	4	0	0
chlorpyrifos	Lorsban 4E	636	half	2	4	3	0	4	0	0
chlorpyrifos	Lorsban 4E	1272	full	2	4	4	0	4	0	0
chlorpyrifos	Lorsban 4E	2544	double	2	4	3	1	4	0	0
chlorpyrifos	Lorsban 4E	636	half	3	4	3	0	4	0	0
chlorpyrifos	Lorsban 4E	1272	full	3	4	4	0	4	0	0
chlorpyrifos	Lorsban 4E	2544	double	3	4	3	1	4	0	0
chlorpyrifos	Lorsban 4E	636	half	9	4	2	0	4	0	0
chlorpyrifos	Lorsban 4E	1272	full	9	4	3	1	4	0	0
chlorpyrifos	Lorsban 4E	2544	double	9	3	3	0	4	0	0
chlorpyrifos	Lorsban 4E	636	half	11	5	3	0	5	0	0
chlorpyrifos	Lorsban 4E	1272	full	11	5	2	0	5	0	0
chlorpyrifos	Lorsban 4E	2544	double	11	5	4	1	5	0	0
malathion	Malathion 85E	518.5	half	1	5	0	0	5	0	0
malathion	Malathion 85E	1037	full	1	6	2	0	5	0	0
malathion	Malathion 85E	2074	double	1	5	3	0	5	0	0
malathion	Malathion 85E	518.5	half	2	5	0	0	5	0	0
malathion	Malathion 85E	1037	full	2	5	2	0	5	0	0
malathion	Malathion 85E	2074	double	2	5	5	0	5	0	0
malathion	Malathion 85E	518.5	half	3	5	2	0	5	0	0
malathion	Malathion 85E	1037	full	3	5	2	0	5	0	0
malathion	Malathion 85E	2074	double	3	5	5	0	5	0	0
malathion	Malathion 85E	518.5	half	4	5	0	0	5	1	0
malathion	Malathion 85E	1037	full	4	5	2	1	5	1	0
malathion	Malathion 85E	2074	double	4	5	5	0	5	1	0
malathion	Malathion 85E	518.5	half	5	5	1	0	5	1	0
malathion	Malathion 85E	1037	full	5	5	3	0	5	1	0
malathion	Malathion 85E	2074	double	5	5	5	0	5	1	0
malathion	Malathion 85E	518.5	half	6	5	2	0	5	0	0
malathion	Malathion 85E	1037	full	6	5	2	1	5	0	0
malathion	Malathion 85E	2074	double	6	5	5	0	5	0	0
malathion	Malathion 85E	518.5	half	7	5	2	0	5	0	0
malathion	Malathion 85E	1037	full	7	5	3	0	5	0	0
malathion	Malathion 85E	2074	double	7	5	5	0	5	0	0
malathion	Malathion 85E	518.5	half	8	5	1	0	6	1	0
malathion	Malathion 85E	1037	full	8	5	0	0	6	1	0
malathion	Malathion 85E	2074	double	8	5	4	1	6	1	0
malathion	Malathion 85E	518.5	half	9	5	2	0	5	0	0
malathion	Malathion 85E	1037	full	9	5	0	0	5	0	0
malathion	Malathion 85E	2074	double	9	5	4	1	5	0	0
malathion	Malathion 85E	518.5	half	10	5	0	1	5	0	0
malathion	Malathion 85E	1037	full	10	5	0	0	5	0	0
malathion	Malathion 85E	2074	double	10	5	3	0	5	0	0
lambda-cyhalothrin	Matador 120EC	5.6	half	1	5	1	0	5	0	0
lambda-cyhalothrin	Matador 120EC	11.2	full	1	5	2	0	5	0	0
lambda-cyhalothrin	Matador 120EC	22.4	double	1	5	0	1	5	0	0
lambda-cyhalothrin	Matador 120EC	5.6	half	2	5	0	0	5	1	0
lambda-cyhalothrin	Matador 120EC	11.2	full	2	5	0	0	5	1	0
lambda-cyhalothrin	Matador 120EC	22.4	double	2	5	0	1	5	1	0
lambda-cyhalothrin	Matador 120EC	5.6	half	3	5	1	0	5	1	0
lambda-cyhalothrin	Matador 120EC	11.2	full	3	5	0	0	5	1	0
lambda-cyhalothrin	Matador 120EC	22.4	double	3	5	0	0	5	1	0
lambda-cyhalothrin	Matador 120EC	5.6	half	4	5	3	0	5	0	0
lambda-cyhalothrin	Matador 120EC	11.2	full	4	5	0	0	5	0	0
lambda-cyhalothrin	Matador 120EC	22.4	double	4	5	0	0	5	0	0
lambda-cyhalothrin	Matador 120EC	5.6	half	5	5	0	0	5	0	0
lambda-cyhalothrin	Matador 120EC	11.2	full	5	5	0	0	5	0	0
lambda-cyhalothrin	Matador 120EC	22.4	double	5	5	0	0	5	0	0
lambda-cyhalothrin	Matador 120EC	5.6	half	8	4	1	0	4	0	0
lambda-cyhalothrin	Matador 120EC	11.2	full	8	5	1	0	4	0	0
lambda-cyhalothrin	Matador 120EC	22.4	double	8	4	1	0	4	0	0
lambda-cyhalothrin	Matador 120EC	5.6	half	9	5	0	0	5	1	0
lambda-cyhalothrin	Matador 120EC	11.2	full	9	5	1	0	5	1	0
lambda-cyhalothrin	Matador 120EC	22.4	double	9	4	1	0	5	1	0
thiamethoxam+novaluron	Actara 25WG+Rimon 10EC	43.8+58.3	half	1	5	1	4	5	0	0
thiamethoxam+novaluron	Actara 25WG+Rimon 10EC	87.5+116.5	full	1	5	1	4	5	0	0
thiamethoxam+novaluron	Actara 25WG+Rimon 10EC	175+233	double	1	5	2	3	5	0	0
thiamethoxam+novaluron	Actara 25WG+Rimon 10EC	43.8+58.3	half	3	5	1	4	5	0	0
thiamethoxam+novaluron	Actara 25WG+Rimon 10EC	87.5+116.5	full	3	5	2	3	5	0	0
thiamethoxam+novaluron	Actara 25WG+Rimon 10EC	175+233	double	3	5	0	5	5	0	0
thiamethoxam+novaluron	Actara 25WG+Rimon 10EC	43.8+58.3	half	4	5	0	5	5	0	0
thiamethoxam+novaluron	Actara 25WG+Rimon 10EC	87.5+116.5	full	4	5	1	4	5	0	0
thiamethoxam+novaluron	Actara 25WG+Rimon 10EC	175+233	double	4	5	0	5	5	0	0
thiamethoxam+novaluron	Actara 25WG+Rimon 10EC	43.8+58.3	half	5	5	1	4	5	0	0
thiamethoxam+novaluron	Actara 25WG+Rimon 10EC	87.5+116.5	full	5	5	0	5	5	0	0
thiamethoxam+novaluron	Actara 25WG+Rimon 10EC	175+233	double	5	5	0	5	5	0	0
thiamethoxam+novaluron	Actara 25WG+Rimon 10EC	43.8+58.3	half	6	5	0	5	5	0	0
thiamethoxam+novaluron	Actara 25WG+Rimon 10EC	87.5+116.5	full	6	5	2	3	5	0	0
thiamethoxam+novaluron	Actara 25WG+Rimon 10EC	175+233	double	6	5	1	4	5	0	0
thiamethoxam+novaluron	Actara 25WG+Rimon 10EC	43.8+58.3	half	7	4	2	3	5	0	0
thiamethoxam+novaluron	Actara 25WG+Rimon 10EC	87.5+116.5	full	7	5	1	4	5	0	0
thiamethoxam+novaluron	Actara 25WG+Rimon 10EC	175+233	double	7	5	0	5	5	0	0
thiamethoxam+novaluron	Actara 25WG+Rimon 10EC	43.8+58.3	half	8	5	4	1	5	1	0
thiamethoxam+novaluron	Actara 25WG+Rimon 10EC	87.5+116.5	full	8	5	1	4	5	1	0
thiamethoxam+novaluron	Actara 25WG+Rimon 10EC	175+233	double	8	5	0	5	5	1	0
thiamethoxam+novaluron	Actara 25WG+Rimon 10EC	43.8+58.3	half	9	5	1	4	5	0	0
thiamethoxam+novaluron	Actara 25WG+Rimon 10EC	87.5+116.5	full	9	5	1	4	5	0	0
thiamethoxam+novaluron	Actara 25WG+Rimon 10EC	175+233	double	9	5	4	1	5	0	0
thiamethoxam+novaluron	Actara 25WG+Rimon 10EC	43.8+58.3	half	11	5	1	4	5	1	0
thiamethoxam+novaluron	Actara 25WG+Rimon 10EC	87.5+116.5	full	11	5	1	4	5	1	0
thiamethoxam+novaluron	Actara 25WG+Rimon 10EC	175+233	double	11	5	0	5	5	1	0
novaluron	Rimon 10EC	58.3	half	1	5	1	0	5	0	0
novaluron	Rimon 10EC	116.5	full	1	5	0	0	5	0	0
novaluron	Rimon 10EC	233	double	1	5	0	0	5	0	0
novaluron	Rimon 10EC	58.3	half	2	5	1	0	5	1	0
novaluron	Rimon 10EC	116.5	full	2	5	0	0	5	1	0
novaluron	Rimon 10EC	233	double	2	4	0	0	5	1	0
novaluron	Rimon 10EC	58.3	half	3	5	0	0	5	0	0
novaluron	Rimon 10EC	116.5	full	3	5	0	0	5	0	0
novaluron	Rimon 10EC	233	double	3	5	0	0	5	0	0
novaluron	Rimon 10EC	58.3	half	4	5	0	0	5	0	0
novaluron	Rimon 10EC	116.5	full	4	5	0	0	5	0	0
novaluron	Rimon 10EC	233	double	4	5	1	0	5	0	0
novaluron	Rimon 10EC	58.3	half	5	5	0	0	5	0	0
novaluron	Rimon 10EC	116.5	full	5	5	0	0	5	0	0
novaluron	Rimon 10EC	233	double	5	5	0	0	5	0	0
novaluron	Rimon 10EC	58.3	half	6	5	0	0	5	0	0
novaluron	Rimon 10EC	116.5	full	6	5	0	0	5	0	0
novaluron	Rimon 10EC	233	double	6	5	0	0	5	0	0
novaluron	Rimon 10EC	58.3	half	7	5	0	0	5	0	0
novaluron	Rimon 10EC	116.5	full	7	5	0	0	5	0	0
novaluron	Rimon 10EC	58.3	half	8	5	0	0	4	0	0
novaluron	Rimon 10EC	116.5	full	8	5	0	0	4	0	0
novaluron	Rimon 10EC	233	double	8	5	1	0	4	0	0
novaluron	Rimon 10EC	58.3	half	9	5	0	0	5	0	0
novaluron	Rimon 10EC	116.5	full	9	5	0	0	5	0	0
novaluron	Rimon 10EC	233	double	9	5	0	0	5	0	0
novaluron	Rimon 10EC	58.3	half	10	5	0	0	5	0	0
novaluron	Rimon 10EC	116.5	full	10	5	0	0	5	0	0
novaluron	Rimon 10EC	233	double	10	5	1	0	5	0	0
flupyradifurone	Sivanto	75	half	1	4	1	0	5	0	0
flupyradifurone	Sivanto	150	full	1	5	0	0	5	0	0
flupyradifurone	Sivanto	300	double	1	5	0	0	5	0	0
flupyradifurone	Sivanto	75	half	2	5	0	0	5	1	0
flupyradifurone	Sivanto	150	full	2	5	1	0	5	1	0
flupyradifurone	Sivanto	300	double	2	5	0	0	5	1	0
flupyradifurone	Sivanto	75	half	3	5	0	0	5	0	0
flupyradifurone	Sivanto	150	full	3	5	0	0	5	0	0
flupyradifurone	Sivanto	300	double	3	5	2	1	5	0	0
flupyradifurone	Sivanto	75	half	4	5	1	0	5	0	0
flupyradifurone	Sivanto	150	full	4	5	1	0	5	0	0
flupyradifurone	Sivanto	300	double	4	5	1	0	5	0	0
flupyradifurone	Sivanto	75	half	5	5	0	0	5	1	0
flupyradifurone	Sivanto	150	full	5	5	0	0	5	1	0
flupyradifurone	Sivanto	300	double	5	5	2	0	5	1	0
flupyradifurone	Sivanto	75	half	6	5	0	0	5	1	0
flupyradifurone	Sivanto	150	full	6	5	1	0	5	1	0
flupyradifurone	Sivanto	300	double	6	5	0	2	5	1	0
flupyradifurone	Sivanto	75	half	7	5	0	0	5	0	0
flupyradifurone	Sivanto	150	full	7	5	2	0	5	0	0
flupyradifurone	Sivanto	300	double	7	5	1	0	5	0	0
flupyradifurone	Sivanto	75	half	8	5	1	0	5	0	0
flupyradifurone	Sivanto	150	full	8	5	0	0	5	0	0
flupyradifurone	Sivanto	300	double	8	5	2	0	5	0	0
flupyradifurone	Sivanto	75	half	9	5	0	0	5	0	0
flupyradifurone	Sivanto	150	full	9	5	1	0	5	0	0
flupyradifurone	Sivanto	300	double	9	5	0	0	5	0	0
flupyradifurone	Sivanto	75	half	10	5	0	0	5	0	0
flupyradifurone	Sivanto	150	full	10	5	1	0	5	0	0
flupyradifurone	Sivanto	300	double	10	5	0	0	5	0	0
Beauveria bassiana	BotaniGard	220.7	half	1	5	1	0	5	1	0
Beauveria bassiana	BotaniGard	441.4	full	1	5	1	0	5	1	0
Beauveria bassiana	BotaniGard	882.8	double	1	5	0	0	5	1	0
Beauveria bassiana	BotaniGard	220.7	half	2	5	0	0	5	0	0
Beauveria bassiana	BotaniGard	441.4	full	2	5	0	0	5	0	0
Beauveria bassiana	BotaniGard	882.8	double	2	5	0	0	5	0	0
Beauveria bassiana	BotaniGard	220.7	half	3	5	0	0	5	0	0
Beauveria bassiana	BotaniGard	441.4	full	3	5	2	0	5	0	0
Beauveria bassiana	BotaniGard	882.8	double	3	5	1	0	5	0	0
Beauveria bassiana	BotaniGard	220.7	half	4	5	0	0	5	0	0
Beauveria bassiana	BotaniGard	441.4	full	4	5	2	0	5	0	0
Beauveria bassiana	BotaniGard	882.8	double	4	5	0	0	5	0	0
Beauveria bassiana	BotaniGard	220.7	half	5	5	1	0	5	0	0
Beauveria bassiana	BotaniGard	441.4	full	5	5	2	0	5	0	0
Beauveria bassiana	BotaniGard	882.8	double	5	5	0	0	5	0	0
Beauveria bassiana	BotaniGard	220.7	half	6	5	0	0	5	0	0
Beauveria bassiana	BotaniGard	441.4	full	6	5	0	0	5	0	0
Beauveria bassiana	BotaniGard	882.8	double	6	5	0	0	5	0	0
Beauveria bassiana	BotaniGard	220.7	half	7	5	0	0	5	0	0
Beauveria bassiana	BotaniGard	441.4	full	7	5	0	0	5	0	0
Beauveria bassiana	BotaniGard	882.8	double	7	5	0	0	5	0	0
Beauveria bassiana	BotaniGard	220.7	half	8	5	1	0	5	0	0
Beauveria bassiana	BotaniGard	441.4	full	8	5	0	0	5	0	0
Beauveria bassiana	BotaniGard	882.8	double	8	5	1	0	5	0	0
Beauveria bassiana	BotaniGard	220.7	half	9	5	1	0	5	0	0
Beauveria bassiana	BotaniGard	441.4	full	9	5	1	0	5	0	0
Beauveria bassiana	BotaniGard	882.8	double	9	5	0	0	5	0	0

## Sheet: Residual Contact Raw Data
Active Ingredient	Formulation	Concentration (mg a.i./L)	Rate	Rep	n	48 h Mortality	48 h Severely Affected	Control n	Control 48 h Mortaility	Control 48 h Severely Affected
clothianidin	Clutch 50WG	78.8	half	1	5	0	1	5	0	0
clothianidin	Clutch 50WG	157.5	full	1	5	1	0	5	0	0
clothianidin	Clutch 50WG	351	double	1	5	1	2	5	0	0
clothianidin	Clutch 50WG	78.8	half	2	5	2	1	5	0	0
clothianidin	Clutch 50WG	157.5	full	2	5	0	2	5	0	0
clothianidin	Clutch 50WG	351	double	2	5	2	3	5	0	0
clothianidin	Clutch 50WG	78.8	half	3	5	0	2	5	0	0
clothianidin	Clutch 50WG	157.5	full	3	5	1	2	5	0	0
clothianidin	Clutch 50WG	351	double	3	5	2	1	5	0	0
clothianidin	Clutch 50WG	78.8	half	4	4	0	0	5	0	0
clothianidin	Clutch 50WG	157.5	full	4	2	1	0	5	0	0
clothianidin	Clutch 50WG	351	double	4	5	2	3	5	0	0
clothianidin	Clutch 50WG	78.8	half	5	5	2	3	5	0	0
clothianidin	Clutch 50WG	157.5	full	5	5	1	4	5	0	0
clothianidin	Clutch 50WG	351	double	5	5	0	5	5	0	0
clothianidin	Clutch 50WG	78.8	half	6	5	0	4	5	0	0
clothianidin	Clutch 50WG	157.5	full	6	5	1	4	5	0	0
chlorpyrifos	Lorsban 4E	636	half	1	5	5	0	5	0	0
chlorpyrifos	Lorsban 4E	1272	full	1	5	5	0	5	0	0
chlorpyrifos	Lorsban 4E	2544	double	1	5	5	0	5	0	0
chlorpyrifos	Lorsban 4E	636	half	2	5	5	0	5	0	0
chlorpyrifos	Lorsban 4E	1272	full	2	7	5	2	5	0	0
chlorpyrifos	Lorsban 4E	2544	double	2	5	5	0	5	0	0
chlorpyrifos	Lorsban 4E	636	half	3	5	4	1	6	1	0
chlorpyrifos	Lorsban 4E	1272	full	3	5	4	1	6	1	0
chlorpyrifos	Lorsban 4E	2544	double	3	5	5	0	6	1	0
chlorpyrifos	Lorsban 4E	636	half	4	5	5	0	5	0	0
chlorpyrifos	Lorsban 4E	1272	full	4	5	5	0	5	0	0
chlorpyrifos	Lorsban 4E	2544	double	4	5	5	0	5	0	0
thiamethoxam	Actara 25WG	43.8	half	1	5	0	1	5	0	0
thiamethoxam	Actara 25WG	87.5	full	1	5	0	3	5	0	0
thiamethoxam	Actara 25WG	175	double	1	5	0	2	5	0	0
thiamethoxam	Actara 25WG	43.8	half	2	5	0	1	5	0	0
thiamethoxam	Actara 25WG	87.5	full	2	5	0	4	5	0	0
thiamethoxam	Actara 25WG	175	double	2	5	1	3	5	0	0
thiamethoxam	Actara 25WG	43.8	half	3	5	0	4	5	0	0
thiamethoxam	Actara 25WG	87.5	full	3	5	0	5	5	0	0
thiamethoxam	Actara 25WG	175	double	3	5	0	5	5	0	0
thiamethoxam	Actara 25WG	43.8	half	4	5	0	3	5	0	0
thiamethoxam	Actara 25WG	87.5	full	4	5	0	5	5	0	0
thiamethoxam	Actara 25WG	175	double	4	5	0	5	5	0	0
thiamethoxam	Actara 25WG	43.8	half	6	5	0	4	5	0	0
thiamethoxam	Actara 25WG	87.5	full	6	5	0	5	5	0	0
thiamethoxam	Actara 25WG	175	double	6	5	2	3	5	0	0
thiamethoxam	Actara 25WG	43.8	half	5	5	0	5	5	0	0
thiamethoxam	Actara 25WG	87.5	full	5	5	0	5	5	0	0
thiamethoxam	Actara 25WG	175	double	5	5	1	4	5	0	0
lambda-cyhalothrin	Matador 120EC	5.6	half	1	5	0	0	5	0	0
lambda-cyhalothrin	Matador 120EC	11.2	full	1	5	0	0	5	0	0
lambda-cyhalothrin	Matador 120EC	22.4	double	1	5	0	0	5	0	0
lambda-cyhalothrin	Matador 120EC	5.6	half	2	5	0	0	5	0	0
lambda-cyhalothrin	Matador 120EC	11.2	full	2	5	0	0	5	0	0
lambda-cyhalothrin	Matador 120EC	22.4	double	2	6	0	1	5	0	0
lambda-cyhalothrin	Matador 120EC	5.6	half	3	5	0	2	5	0	0
lambda-cyhalothrin	Matador 120EC	11.2	full	3	5	0	0	5	0	0
lambda-cyhalothrin	Matador 120EC	22.4	double	3	5	0	0	5	0	0
lambda-cyhalothrin	Matador 120EC	5.6	half	4	5	0	5	5	0	0
lambda-cyhalothrin	Matador 120EC	11.2	full	4	5	2	3	5	0	0
lambda-cyhalothrin	Matador 120EC	22.4	double	4	5	0	5	5	0	0
lambda-cyhalothrin	Matador 120EC	5.6	half	5	5	0	5	5	0	0
lambda-cyhalothrin	Matador 120EC	11.2	full	5	5	0	5	5	0	0
lambda-cyhalothrin	Matador 120EC	22.4	double	5	5	0	5	5	0	0
lambda-cyhalothrin	Matador 120EC	5.6	half	6	5	0	5	5	0	0
lambda-cyhalothrin	Matador 120EC	11.2	full	6	5	1	3	5	0	0
lambda-cyhalothrin	Matador 120EC	22.4	double	6	5	1	4	5	0	0
novaluron	Rimon 10EC	58.3	half	1	5	0	0	5	1	0
novaluron	Rimon 10EC	116.5	full	1	5	0	0	5	1	0
novaluron	Rimon 10EC	233	double	1	5	0	0	5	1	0
novaluron	Rimon 10EC	58.3	half	2	5	0	0	5	0	0
novaluron	Rimon 10EC	116.5	full	2	5	0	0	5	0	0
novaluron	Rimon 10EC	233	double	2	5	0	0	5	0	0
novaluron	Rimon 10EC	58.3	half	3	5	0	0	5	0	0
novaluron	Rimon 10EC	116.5	full	3	5	1	0	5	0	0
novaluron	Rimon 10EC	233	double	3	5	0	0	5	0	0
novaluron	Rimon 10EC	58.3	half	4	5	0	0	5	0	0
novaluron	Rimon 10EC	116.5	full	4	5	0	0	5	0	0
novaluron	Rimon 10EC	233	double	4	5	0	0	5	0	0
flupyradifurone	Sivanto	75	half	1	5	0	0	5	0	0
flupyradifurone	Sivanto	150	full	1	5	0	1	5	0	0
flupyradifurone	Sivanto	300	double	1	5	0	1	5	0	0
flupyradifurone	Sivanto	75	half	2	5	0	0	5	0	0
flupyradifurone	Sivanto	150	full	2	5	0	2	5	0	0
flupyradifurone	Sivanto	300	double	2	6	0	5	5	0	0
flupyradifurone	Sivanto	75	half	3	5	0	0	5	0	0
flupyradifurone	Sivanto	150	full	3	5	0	0	5	0	0
flupyradifurone	Sivanto	300	double	3	5	0	0	5	0	0
flupyradifurone	Sivanto	75	half	4	5	0	0	5	1	0
flupyradifurone	Sivanto	150	full	4	5	0	0	5	1	0
flupyradifurone	Sivanto	300	double	4	5	2	0	5	1	0
thiamethoxam+lambda-cyhalothrin	Endigo	12.8+9.6	half	1	5	0	1	5	0	0
thiamethoxam+lambda-cyhalothrin	Endigo	25.5+19.1	full	1	5	0	5	5	0	0
thiamethoxam+lambda-cyhalothrin	Endigo	51+38.2	double	1	5	0	5	5	0	0
thiamethoxam+lambda-cyhalothrin	Endigo	12.8+9.6	half	2	5	0	4	5	0	0
thiamethoxam+lambda-cyhalothrin	Endigo	25.5+19.1	full	2	4	0	4	5	0	0
thiamethoxam+lambda-cyhalothrin	Endigo	51+38.2	double	2	5	0	5	5	0	0
thiamethoxam+lambda-cyhalothrin	Endigo	12.8+9.6	half	3	5	0	5	5	0	0
thiamethoxam+lambda-cyhalothrin	Endigo	25.5+19.1	full	3	5	0	4	5	0	0
thiamethoxam+lambda-cyhalothrin	Endigo	51+38.2	double	3	5	0	5	5	0	0
thiamethoxam+lambda-cyhalothrin	Endigo	12.8+9.6	half	4	5	1	4	5	0	0
thiamethoxam+lambda-cyhalothrin	Endigo	25.5+19.1	full	4	5	2	2	5	0	0
thiamethoxam+lambda-cyhalothrin	Endigo	51+38.2	double	4	5	1	3	5	0	0
thiamethoxam+lambda-cyhalothrin	Endigo	12.8+9.6	half	5	5	1	4	5	0	0
thiamethoxam+lambda-cyhalothrin	Endigo	25.5+19.1	full	5	5	1	4	5	0	0
thiamethoxam+lambda-cyhalothrin	Endigo	51+38.2	double	5	5	0	4	5	0	0
thiamethoxam+lambda-cyhalothrin	Endigo	12.8+9.6	half	6	5	0	4	5	0	0
thiamethoxam+lambda-cyhalothrin	Endigo	25.5+19.1	full	6	5	0	5	5	0	0
thiamethoxam+lambda-cyhalothrin	Endigo	51+38.2	double	6	5	2	3	5	0	0
sulfoxaflor	Closer	30	half	1	5	2	0	5	0	0
sulfoxaflor	Closer	60	full	1	5	1	4	5	0	0
sulfoxaflor	Closer	120	double	1	5	2	3	5	0	0
sulfoxaflor	Closer	30	half	2	5	1	4	5	0	0
sulfoxaflor	Closer	60	full	2	5	0	4	5	0	0
sulfoxaflor	Closer	120	double	2	5	0	5	5	0	0
sulfoxaflor	Closer	30	half	3	5	0	3	5	0	0
sulfoxaflor	Closer	60	full	3	5	0	3	5	0	0
sulfoxaflor	Closer	120	double	3	5	0	2	5	0	0
sulfoxaflor	Closer	30	half	4	5	0	5	5	0	0
sulfoxaflor	Closer	60	full	4	5	0	4	5	0	0
sulfoxaflor	Closer	120	double	4	5	0	4	5	0	0
sulfoxaflor	Closer	30	half	5	5	0	0	5	0	0
sulfoxaflor	Closer	60	full	5	4	0	0	5	0	0
sulfoxaflor	Closer	120	double	5	5	0	2	5	0	0
sulfoxaflor	Closer	30	half	6	5	1	0	6	0	0
sulfoxaflor	Closer	60	full	6	5	0	2	6	0	0
sulfoxaflor	Closer	120	double	6	5	0	2	6	0	0
Beauveria bassiana	BotaniGard	220.7	half	1	5	0	0	5	0	0
Beauveria bassiana	BotaniGard	441.4	full	1	5	0	0	5	0	0
Beauveria bassiana	BotaniGard	882.8	double	1	5	0	0	5	0	0
Beauveria bassiana	BotaniGard	220.7	half	2	5	0	0	5	0	0
Beauveria bassiana	BotaniGard	441.4	full	2	5	0	0	5	0	0
Beauveria bassiana	BotaniGard	882.8	double	2	5	0	0	5	0	0
Beauveria bassiana	BotaniGard	220.7	half	3	5	0	0	5	0	0
Beauveria bassiana	BotaniGard	441.4	full	3	5	0	0	5	0	0
Beauveria bassiana	BotaniGard	882.8	double	3	5	0	0	5	0	0
Beauveria bassiana	BotaniGard	220.7	half	4	5	0	0	5	0	0
Beauveria bassiana	BotaniGard	441.4	full	4	5	0	0	5	0	0
Beauveria bassiana	BotaniGard	882.8	double	4	4	0	0	5	0	0
Beauveria bassiana	BotaniGard	220.7	half	5	5	0	0	5	0	0
Beauveria bassiana	BotaniGard	441.4	full	5	5	0	0	5	0	0
Beauveria bassiana	BotaniGard	882.8	double	5	5	0	0	5	0	0
Beauveria bassiana	BotaniGard	220.7	half	6	5	0	0	5	0	0
Beauveria bassiana	BotaniGard	441.4	full	6	5	0	0	5	0	0
Beauveria bassiana	BotaniGard	882.8	double	6	5	0	0	5	0	0
thiamethoxam+novaluron	Actara 25WG+Rimon 10EC	43.8+58.3	half	1	5	0	3	5	0	0
thiamethoxam+novaluron	Actara 25WG+Rimon 10EC	87.5+116.5	full	1	5	0	5	5	0	0
thiamethoxam+novaluron	Actara 25WG+Rimon 10EC	175+233	double	1	5	0	5	5	0	0
thiamethoxam+novaluron	Actara 25WG+Rimon 10EC	43.8+58.3	half	2	5	0	4	5	0	0
thiamethoxam+novaluron	Actara 25WG+Rimon 10EC	87.5+116.5	full	2	5	0	5	5	0	0
thiamethoxam+novaluron	Actara 25WG+Rimon 10EC	175+233	double	2	5	0	5	5	0	0
thiamethoxam+novaluron	Actara 25WG+Rimon 10EC	43.8+58.3	half	3	5	0	3	5	0	0
thiamethoxam+novaluron	Actara 25WG+Rimon 10EC	87.5+116.5	full	3	5	0	4	5	0	0
thiamethoxam+novaluron	Actara 25WG+Rimon 10EC	175+233	double	3	5	2	1	5	0	0
thiamethoxam+novaluron	Actara 25WG+Rimon 10EC	43.8+58.3	half	4	5	0	3	5	0	0
thiamethoxam+novaluron	Actara 25WG+Rimon 10EC	87.5+116.5	full	4	5	0	5	5	0	0
thiamethoxam+novaluron	Actara 25WG+Rimon 10EC	175+233	double	4	4	0	5	5	0	0
thiamethoxam+novaluron	Actara 25WG+Rimon 10EC	43.8+58.3	half	5	5	0	3	5	0	0
thiamethoxam+novaluron	Actara 25WG+Rimon 10EC	87.5+116.5	full	5	5	0	0	5	0	0
thiamethoxam+novaluron	Actara 25WG+Rimon 10EC	175+233	double	5	5	1	4	5	0	0
thiamethoxam+novaluron	Actara 25WG+Rimon 10EC	43.8+58.3	half	6	5	0	2	5	0	0
thiamethoxam+novaluron	Actara 25WG+Rimon 10EC	87.5+116.5	full	6	5	1	3	5	0	0
thiamethoxam+novaluron	Actara 25WG+Rimon 10EC	175+233	double	6	5	1	2	5	0	0

## Sheet: Shapiro-Wilk Test Statistics
Data Set	W	P value
direct contact mortality	0.76	< 0.0001
residual contact morality	0.551	< 0.0001
direct contact severely affected	0.638	< 0.0001
residual contact severely affected	0.812	< 0.0001
